# Supplementary material
Source: PubMed Central journal article supplement (PMC9646503)
Supplement: 41586_2022_5371_MOESM1_ESM.pdf [file 41586_2022_5371_MOESM1_ESM.pdf]

---

**Supplementary information**

---

**Functional antibodies exhibit light chain coherence**

---

In the format provided by the authors and unedited

**Supplementary Data for:**

# Functional antibodies exhibit light chain coherence

David B. Jaffe<sup>1,\*</sup>, Payam Shahi<sup>1,2</sup>, Bruce A. Adams<sup>1,3</sup>, Ashley M. Chrisman<sup>1,3</sup>, Peter M. Finnegan<sup>1,3</sup>, Nandhini Raman<sup>1,3</sup>, Ariel E. Royall<sup>1,3</sup>, FuNien Tsai<sup>1,3</sup>, Thomas Vollbrecht<sup>1,3</sup>, Daniel S. Reyes<sup>1,2</sup>, N. Lance Hepler<sup>2</sup>, and Wyatt J. McDonnell<sup>1,\*</sup>

<sup>1</sup> 10x Genomics, Inc. 6230 Stoneridge Mall Rd, Pleasanton, CA, 94588. USA.

<sup>2</sup> These authors contributed equally.

<sup>3</sup> These authors contributed equally.

\* Corresponding authors [[99.david.b.jaffe@gmail.com](mailto:99.david.b.jaffe@gmail.com); [wyattmcdonnell@gmail.com](mailto:wyattmcdonnell@gmail.com)]

**Supplementary Table 1. All data analyzed and distributed as part of this work.**

| <b>Sample type</b> | <b>Disease</b>                                                 | <b>Data identifier(s) to access in enclone</b>                                                                                                                                               | <b>Reference</b> | <b># of donors</b> | <b># of cells after filtering</b> |
|--------------------|----------------------------------------------------------------|----------------------------------------------------------------------------------------------------------------------------------------------------------------------------------------------|------------------|--------------------|-----------------------------------|
| PBMCs              | Healthy donors, longitudinally sampled                         | phad/phad.meta                                                                                                                                                                               | Phad et al.      | 2                  | 247,516                           |
| CSF, PBMCs         | Multiple sclerosis                                             | part of enclone_paper/scr/other/all.meta                                                                                                                                                     | Ramesh et al.    | 2                  | 8,384                             |
| PBMCs              | COVID-19                                                       | part of enclone_paper/scr/other/all.meta                                                                                                                                                     | Sokal et al.     | 5                  | 6,361                             |
| PBMCs              | Healthy, neuromyelitis optica, neurosarcoidosis, RRMS, uveitis | part of enclone_paper/scr/other/all.meta                                                                                                                                                     | Ramesh et al.    | 1*                 | 161,836                           |
| PBMCs              | Kawasaki disease                                               | part of enclone_paper/scr/other/all.meta                                                                                                                                                     | Wang et al.      | 2*                 | 17,123                            |
| PBMCs              | Chronic HIV infection                                          | part of enclone_paper/scr/other/all.meta                                                                                                                                                     | Setliff et al.   | 2                  | 5,391                             |
| PBMCs              | Healthy donor                                                  | 165808, 1017974-1017977, 1018095-1018098, 1018288, 1018296-1018298, 1018301, 1021358, 1021360-1021362, 1029474-1029477, 1031844-1031848, 1031850, 1031851, 1031853, 1031854, 1031856-1031858 | 10x Genomics     | 1                  | 39,020                            |
| Tumor              | Ovarian cancer                                                 | 123805, 123089, 123547                                                                                                                                                                       | 10x Genomics     | 1                  | 2,888                             |
| PBMCs              | MALT lymphoma                                                  | 83808, 86233                                                                                                                                                                                 | 10x Genomics     | 1                  | 9,495                             |
| PBMCs              | Lupus                                                          | 86237                                                                                                                                                                                        | 10x Genomics     | 1                  | 252                               |
| PBMCs              | Healthy donor                                                  | 45977                                                                                                                                                                                        | 10x Genomics     | 1                  | 8,275                             |
| Tumor              | Lung cancer                                                    | 165807                                                                                                                                                                                       | 10x Genomics     | 1                  | 1,191                             |
| PBMCs              | Healthy donor                                                  | 40935                                                                                                                                                                                        | 10x Genomics     | 1                  | 17,628                            |
| PBMCs              | Healthy donor                                                  | 52177                                                                                                                                                                                        | 10x Genomics     | 1                  | 1,833                             |
| PBMCs              | Healthy donor                                                  | 47201                                                                                                                                                                                        | 10x Genomics     | 1                  | 480                               |
| PBMCs              | Healthy donor                                                  | 47202                                                                                                                                                                                        | 10x Genomics     | 1                  | 472                               |
| PBMCs              | Healthy donor                                                  | 42787, 42788, 42789                                                                                                                                                                          | 10x Genomics     | 1                  | 40                                |
|                    | <b>total</b>                                                   |                                                                                                                                                                                              |                  | <b>25</b>          | <b>528,185</b>                    |
| PBMCs              | Jaffe et al.; 4 donors, this work                              | @test                                                                                                                                                                                        | This work        |                    | 1,408,939                         |
|                    | <b>grand total</b>                                             |                                                                                                                                                                                              |                  | <b>29</b>          | <b>1,937,124</b>                  |

\* multiple original donors combined

**Supplementary Table 2. Light chain coherence across multiple datasets.** There are three dataset collections which are referred to. We show light chain coherence across these, with varying levels of detail.

**Summary, and commands used to generate items:**

**(a)** data of this work, using all cells in each clonotype

- Command: public\_light\_chain\_analysis per\_cell\_stuff

| Memory B cells, all cells and clonotypes |                                 |                                          |     |     |     |     |     |     | Naive B cells, all cells and clonotypes |                                 |                                          |     |     |     |     |     |     |
|------------------------------------------|---------------------------------|------------------------------------------|-----|-----|-----|-----|-----|-----|-----------------------------------------|---------------------------------|------------------------------------------|-----|-----|-----|-----|-----|-----|
| CDRH3 amino acid % identity              | log <sub>10</sub> of cell pairs | Donors and percent light chain coherence |     |     |     |     |     |     | CDRH3 amino acid % identity             | log <sub>10</sub> of cell pairs | Donors and percent light chain coherence |     |     |     |     |     |     |
|                                          |                                 | any                                      | 1,2 | 1,3 | 1,4 | 2,3 | 2,4 | 3,4 |                                         |                                 | any                                      | 1,2 | 1,3 | 1,4 | 2,3 | 2,4 | 3,4 |
| 0%                                       | 5.6                             | 5                                        | 4   | 5   | 5   | 4   | 4   | 5   | 0%                                      | 4.5                             | 4                                        | 4   | 4   | 4   | 4   | 3   | 4   |
| 10%                                      | 7.4                             | 5                                        | 5   | 5   | 5   | 5   | 5   | 5   | 10%                                     | 7.0                             | 5                                        | 5   | 5   | 5   | 4   | 5   | 4   |
| 20%                                      | 8.2                             | 5                                        | 5   | 5   | 5   | 5   | 5   | 5   | 20%                                     | 8.2                             | 5                                        | 5   | 5   | 5   | 5   | 5   | 5   |
| 30%                                      | 8.3                             | 5                                        | 5   | 6   | 5   | 5   | 5   | 5   | 30%                                     | 8.4                             | 5                                        | 5   | 5   | 5   | 5   | 5   | 5   |
| 40%                                      | 8.0                             | 6                                        | 6   | 6   | 6   | 5   | 5   | 6   | 40%                                     | 8.2                             | 5                                        | 5   | 5   | 5   | 5   | 5   | 5   |
| 50%                                      | 7.6                             | 7                                        | 7   | 8   | 7   | 7   | 6   | 6   | 50%                                     | 7.8                             | 5                                        | 5   | 6   | 6   | 5   | 5   | 5   |
| 60%                                      | 6.7                             | 13                                       | 14  | 14  | 13  | 11  | 10  | 11  | 60%                                     | 7.1                             | 6                                        | 6   | 6   | 6   | 6   | 6   | 6   |
| 70%                                      | 5.8                             | 31                                       | 38  | 30  | 30  | 27  | 25  | 25  | 70%                                     | 6.3                             | 6                                        | 6   | 7   | 6   | 6   | 6   | 6   |
| 80%                                      | 5.2                             | 62                                       | 62  | 62  | 67  | 54  | 56  | 57  | 80%                                     | 5.3                             | 7                                        | 7   | 7   | 7   | 7   | 6   | 7   |
| 90%                                      | 4.3                             | 75                                       | 66  | 78  | 79  | 79  | 72  | 75  | 90%                                     | 3.9                             | 8                                        | 7   | 9   | 8   | 7   | 8   | 8   |
| 100%                                     | 3.7                             | 82                                       | 71  | 69  | 92  | 91  | 85  | 72  | 100%                                    | 2.6                             | 10                                       | 9   | 7   | 12  | 9   | 10  | 10  |

| Cell pair counts, log <sub>10</sub> , memory B cells; all cells |     |        |        |        |        |        |        |
|-----------------------------------------------------------------|-----|--------|--------|--------|--------|--------|--------|
| CDRH3-AA % identity                                             | any | d1, d2 | d1, d3 | d1, d4 | d2, d3 | d2, d4 | d3, d4 |
| 0%                                                              | 5.6 | 4.9    | 5.0    | 5.1    | 4.5    | 4.5    | 4.6    |
| 10%                                                             | 7.4 | 6.6    | 6.7    | 6.8    | 6.3    | 6.4    | 6.5    |
| 20%                                                             | 8.2 | 7.4    | 7.5    | 7.6    | 7.1    | 7.2    | 7.3    |
| 30%                                                             | 8.3 | 7.6    | 7.6    | 7.8    | 7.2    | 7.3    | 7.4    |
| 40%                                                             | 8.0 | 7.3    | 7.4    | 7.5    | 6.9    | 7.1    | 7.1    |
| 50%                                                             | 7.6 | 6.8    | 6.9    | 7.0    | 6.4    | 6.6    | 6.6    |
| 60%                                                             | 6.7 | 6.0    | 6.1    | 6.2    | 5.6    | 5.8    | 5.8    |
| 70%                                                             | 5.8 | 5.2    | 5.2    | 5.3    | 4.7    | 4.8    | 4.8    |
| 80%                                                             | 5.2 | 4.5    | 4.5    | 4.7    | 3.9    | 4.1    | 4.1    |
| 90%                                                             | 4.3 | 3.7    | 3.6    | 3.9    | 3.1    | 3.4    | 3.2    |
| 100%                                                            | 3.7 | 3.2    | 2.7    | 3.4    | 2.3    | 2.7    | 2.5    |

| Cell pair counts, log <sub>10</sub> , naive B cells; all cells |     |        |        |        |        |        |        |
|----------------------------------------------------------------|-----|--------|--------|--------|--------|--------|--------|
| CDRH3-AA % identity                                            | any | d1, d2 | d1, d3 | d1, d4 | d2, d3 | d2, d4 | d3, d4 |
| 0%                                                             | 4.5 | 3.5    | 3.6    | 3.7    | 3.8    | 3.9    | 3.9    |
| 10%                                                            | 7.0 | 6.0    | 6.1    | 6.1    | 6.4    | 6.3    | 6.4    |
| 20%                                                            | 8.2 | 7.2    | 7.2    | 7.3    | 7.5    | 7.5    | 7.5    |
| 30%                                                            | 8.4 | 7.4    | 7.4    | 7.5    | 7.7    | 7.8    | 7.8    |
| 40%                                                            | 8.2 | 7.2    | 7.2    | 7.3    | 7.5    | 7.6    | 7.5    |
| 50%                                                            | 7.8 | 6.9    | 6.8    | 7.0    | 7.1    | 7.2    | 7.2    |
| 60%                                                            | 7.1 | 6.3    | 6.1    | 6.3    | 6.3    | 6.6    | 6.4    |
| 70%                                                            | 6.3 | 5.4    | 5.2    | 5.5    | 5.4    | 5.7    | 5.5    |
| 80%                                                            | 5.3 | 4.4    | 4.3    | 4.5    | 4.4    | 4.8    | 4.6    |
| 90%                                                            | 3.9 | 3.0    | 2.9    | 3.1    | 3.0    | 3.3    | 3.2    |
| 100%                                                           | 2.6 | 1.8    | 1.6    | 1.8    | 1.7    | 2.1    | 1.9    |

| Cell counts, log <sub>10</sub> , memory B cells; all cells |     |        |        |        |        |        |        |
|------------------------------------------------------------|-----|--------|--------|--------|--------|--------|--------|
| CDRH3-AA % identity                                        | any | d1, d2 | d1, d3 | d1, d4 | d2, d3 | d2, d4 | d3, d4 |
| 0%                                                         | 5.1 | 4.5    | 4.6    | 4.6    | 4.2    | 4.2    | 4.4    |
| 10%                                                        | 5.8 | 5.4    | 5.5    | 5.5    | 5.2    | 5.3    | 5.3    |
| 20%                                                        | 5.8 | 5.5    | 5.6    | 5.6    | 5.3    | 5.4    | 5.4    |
| 30%                                                        | 5.8 | 5.5    | 5.6    | 5.6    | 5.3    | 5.4    | 5.4    |
| 40%                                                        | 5.8 | 5.5    | 5.5    | 5.6    | 5.3    | 5.3    | 5.4    |
| 50%                                                        | 5.7 | 5.5    | 5.5    | 5.5    | 5.2    | 5.3    | 5.3    |
| 60%                                                        | 5.6 | 5.2    | 5.3    | 5.3    | 5.0    | 5.1    | 5.1    |
| 70%                                                        | 5.2 | 4.8    | 4.8    | 4.9    | 4.4    | 4.6    | 4.6    |
| 80%                                                        | 4.7 | 4.2    | 4.2    | 4.3    | 3.8    | 4.0    | 3.9    |
| 90%                                                        | 4.0 | 3.5    | 3.4    | 3.5    | 3.1    | 3.2    | 3.1    |
| 100%                                                       | 3.4 | 3.0    | 2.7    | 3.0    | 2.3    | 2.6    | 2.4    |

| Cell counts, log <sub>10</sub> , naive B cells; all cells |     |        |        |        |        |        |        |
|-----------------------------------------------------------|-----|--------|--------|--------|--------|--------|--------|
| CDRH3-AA % identity                                       | any | d1, d2 | d1, d3 | d1, d4 | d2, d3 | d2, d4 | d3, d4 |
| 0%                                                        | 4.4 | 3.5    | 3.5    | 3.6    | 3.8    | 3.8    | 3.9    |
| 10%                                                       | 5.8 | 5.3    | 5.3    | 5.3    | 5.5    | 5.5    | 5.5    |
| 20%                                                       | 5.9 | 5.5    | 5.5    | 5.5    | 5.6    | 5.6    | 5.6    |
| 30%                                                       | 5.9 | 5.5    | 5.5    | 5.5    | 5.6    | 5.6    | 5.7    |
| 40%                                                       | 5.9 | 5.5    | 5.5    | 5.5    | 5.6    | 5.6    | 5.6    |
| 50%                                                       | 5.9 | 5.5    | 5.5    | 5.5    | 5.6    | 5.6    | 5.6    |
| 60%                                                       | 5.8 | 5.4    | 5.4    | 5.4    | 5.5    | 5.5    | 5.5    |
| 70%                                                       | 5.6 | 5.1    | 5.0    | 5.1    | 5.1    | 5.3    | 5.2    |
| 80%                                                       | 5.2 | 4.5    | 4.4    | 4.5    | 4.5    | 4.7    | 4.6    |
| 90%                                                       | 4.1 | 3.2    | 3.2    | 3.4    | 3.3    | 3.6    | 3.4    |
| 100%                                                      | 2.9 | 2.0    | 1.9    | 2.1    | 2.0    | 2.3    | 2.2    |

(b) data of this work, using one cell per clonotype

- Command: public\_light\_chain\_analysis per\_cell\_stuff S0L0

Note that for naive cells, results are almost identical to (a) because clonotypes for naive cells almost always contain just one cell.

| Memory B cells; 1 cell per clonotype |                                 |                                          |     |     |     |     |     |     | Naive B cells; 1 cell per clonotype |                                 |                                          |     |     |     |     |     |     |
|--------------------------------------|---------------------------------|------------------------------------------|-----|-----|-----|-----|-----|-----|-------------------------------------|---------------------------------|------------------------------------------|-----|-----|-----|-----|-----|-----|
| CDRH3 amino acid % identity          | log <sub>10</sub> of cell pairs | Donors and percent light chain coherence |     |     |     |     |     |     | CDRH3 amino acid % identity         | log <sub>10</sub> of cell pairs | Donors and percent light chain coherence |     |     |     |     |     |     |
|                                      |                                 | any                                      | 1,2 | 1,3 | 1,4 | 2,3 | 2,4 | 3,4 |                                     |                                 | any                                      | 1,2 | 1,3 | 1,4 | 2,3 | 2,4 | 3,4 |
| 0%                                   | 5.2                             | 5                                        | 5   | 5   | 5   | 5   | 4   | 5   | 0%                                  | 4.5                             | 4                                        | 4   | 4   | 4   | 4   | 4   | 4   |
| 10%                                  | 7.0                             | 5                                        | 5   | 5   | 5   | 4   | 5   | 5   | 10%                                 | 7.0                             | 5                                        | 5   | 5   | 4   | 5   | 4   |     |
| 20%                                  | 7.8                             | 5                                        | 5   | 5   | 5   | 5   | 5   | 5   | 20%                                 | 8.2                             | 5                                        | 5   | 5   | 5   | 5   | 5   |     |
| 30%                                  | 8.0                             | 5                                        | 5   | 5   | 5   | 5   | 5   | 5   | 30%                                 | 8.4                             | 5                                        | 5   | 5   | 5   | 5   | 5   |     |
| 40%                                  | 7.7                             | 5                                        | 6   | 6   | 5   | 5   | 5   | 5   | 40%                                 | 8.2                             | 5                                        | 5   | 5   | 5   | 5   | 5   |     |
| 50%                                  | 7.3                             | 6                                        | 6   | 7   | 6   | 6   | 6   | 6   | 50%                                 | 7.8                             | 5                                        | 5   | 6   | 6   | 5   | 5   |     |
| 60%                                  | 6.4                             | 8                                        | 9   | 10  | 8   | 9   | 7   | 8   | 60%                                 | 7.1                             | 6                                        | 6   | 6   | 6   | 6   | 6   |     |
| 70%                                  | 5.5                             | 17                                       | 19  | 18  | 16  | 18  | 15  | 15  | 70%                                 | 6.3                             | 6                                        | 6   | 6   | 6   | 6   | 6   |     |
| 80%                                  | 4.6                             | 38                                       | 42  | 37  | 41  | 38  | 35  | 33  | 80%                                 | 5.3                             | 7                                        | 7   | 7   | 7   | 7   | 6   |     |
| 90%                                  | 3.7                             | 63                                       | 62  | 61  | 65  | 63  | 64  | 58  | 90%                                 | 3.9                             | 8                                        | 7   | 9   | 9   | 7   | 8   |     |
| 100%                                 | 3.0                             | 79                                       | 74  | 74  | 84  | 80  | 83  | 75  | 100%                                | 2.6                             | 10                                       | 9   | 7   | 10  | 9   | 10  |     |

| Cell pair counts, log <sub>10</sub> , memory B cells; 1 cell |     |        |        |        |        |        |        |
|--------------------------------------------------------------|-----|--------|--------|--------|--------|--------|--------|
| CDRH3-AA % identity                                          | any | d1, d2 | d1, d3 | d1, d4 | d2, d3 | d2, d4 | d3, d4 |
| 0%                                                           | 5.2 | 4.4    | 4.6    | 4.6    | 4.1    | 4.1    | 4.3    |
| 10%                                                          | 7.0 | 6.2    | 6.3    | 6.4    | 6.0    | 6.0    | 6.1    |
| 20%                                                          | 7.8 | 7.1    | 7.2    | 7.2    | 6.9    | 6.9    | 7.0    |
| 30%                                                          | 8.0 | 7.2    | 7.3    | 7.4    | 7.0    | 7.1    | 7.1    |
| 40%                                                          | 7.7 | 7.0    | 7.0    | 7.1    | 6.7    | 6.8    | 6.8    |
| 50%                                                          | 7.3 | 6.5    | 6.6    | 6.7    | 6.2    | 6.4    | 6.4    |
| 60%                                                          | 6.4 | 5.7    | 5.8    | 5.8    | 5.4    | 5.5    | 5.5    |
| 70%                                                          | 5.5 | 4.7    | 4.8    | 4.9    | 4.4    | 4.6    | 4.6    |
| 80%                                                          | 4.6 | 3.9    | 4.0    | 4.0    | 3.6    | 3.7    | 3.7    |
| 90%                                                          | 3.7 | 3.1    | 3.0    | 3.1    | 2.6    | 2.9    | 2.7    |
| 100%                                                         | 3.0 | 2.5    | 2.1    | 2.5    | 1.8    | 2.2    | 2.0    |

| Cell pair counts, log <sub>10</sub> , naive B cells; 1 cell |     |        |        |        |        |        |        |
|-------------------------------------------------------------|-----|--------|--------|--------|--------|--------|--------|
| CDRH3-AA % identity                                         | any | d1, d2 | d1, d3 | d1, d4 | d2, d3 | d2, d4 | d3, d4 |
| 0%                                                          | 4.5 | 3.4    | 3.6    | 3.6    | 3.8    | 3.8    | 3.9    |
| 10%                                                         | 7.0 | 6.0    | 6.1    | 6.1    | 6.4    | 6.3    | 6.4    |
| 20%                                                         | 8.2 | 7.2    | 7.2    | 7.2    | 7.5    | 7.5    | 7.5    |
| 30%                                                         | 8.4 | 7.4    | 7.4    | 7.5    | 7.7    | 7.7    | 7.8    |
| 40%                                                         | 8.2 | 7.2    | 7.2    | 7.3    | 7.5    | 7.6    | 7.5    |
| 50%                                                         | 7.8 | 6.9    | 6.8    | 7.0    | 7.1    | 7.2    | 7.2    |
| 60%                                                         | 7.1 | 6.2    | 6.1    | 6.3    | 6.3    | 6.6    | 6.4    |
| 70%                                                         | 6.3 | 5.4    | 5.2    | 5.4    | 5.4    | 5.7    | 5.5    |
| 80%                                                         | 5.3 | 4.4    | 4.3    | 4.5    | 4.4    | 4.8    | 4.6    |
| 90%                                                         | 3.9 | 3.0    | 2.9    | 3.1    | 3.0    | 3.3    | 3.2    |
| 100%                                                        | 2.6 | 1.8    | 1.6    | 1.8    | 1.7    | 2.1    | 1.9    |

| Cell counts, log <sub>10</sub> , memory B cells; 1 cell |     |        |        |        |        |        |        |
|---------------------------------------------------------|-----|--------|--------|--------|--------|--------|--------|
| CDRH3-AA % identity                                     | any | d1, d2 | d1, d3 | d1, d4 | d2, d3 | d2, d4 | d3, d4 |
| 0%                                                      | 4.9 | 4.2    | 4.4    | 4.4    | 4.0    | 4.0    | 4.2    |
| 10%                                                     | 5.6 | 5.2    | 5.3    | 5.3    | 5.1    | 5.1    | 5.2    |
| 20%                                                     | 5.6 | 5.3    | 5.4    | 5.4    | 5.2    | 5.2    | 5.3    |
| 30%                                                     | 5.6 | 5.3    | 5.4    | 5.4    | 5.2    | 5.2    | 5.3    |
| 40%                                                     | 5.6 | 5.3    | 5.4    | 5.4    | 5.2    | 5.2    | 5.3    |
| 50%                                                     | 5.6 | 5.3    | 5.3    | 5.3    | 5.1    | 5.2    | 5.2    |
| 60%                                                     | 5.4 | 5.1    | 5.1    | 5.1    | 4.9    | 4.9    | 4.9    |
| 70%                                                     | 5.1 | 4.6    | 4.6    | 4.7    | 4.3    | 4.5    | 4.4    |
| 80%                                                     | 4.5 | 3.9    | 4.0    | 4.0    | 3.6    | 3.8    | 3.7    |
| 90%                                                     | 3.7 | 3.2    | 3.1    | 3.2    | 2.8    | 3.0    | 2.9    |
| 100%                                                    | 3.1 | 2.6    | 2.3    | 2.6    | 2.0    | 2.3    | 2.2    |

| Cell counts, log <sub>10</sub> , naive B cells; 1 cell |     |        |        |        |        |        |        |
|--------------------------------------------------------|-----|--------|--------|--------|--------|--------|--------|
| CDRH3-AA % identity                                    | any | d1, d2 | d1, d3 | d1, d4 | d2, d3 | d2, d4 | d3, d4 |
| 0%                                                     | 4.4 | 3.4    | 3.5    | 3.6    | 3.7    | 3.8    | 3.8    |
| 10%                                                    | 5.8 | 5.3    | 5.3    | 5.3    | 5.5    | 5.5    | 5.5    |
| 20%                                                    | 5.9 | 5.5    | 5.5    | 5.5    | 5.6    | 5.6    | 5.6    |
| 30%                                                    | 5.9 | 5.5    | 5.5    | 5.5    | 5.6    | 5.6    | 5.6    |
| 40%                                                    | 5.9 | 5.5    | 5.5    | 5.5    | 5.6    | 5.6    | 5.6    |
| 50%                                                    | 5.9 | 5.5    | 5.5    | 5.5    | 5.6    | 5.6    | 5.6    |
| 60%                                                    | 5.8 | 5.4    | 5.4    | 5.4    | 5.5    | 5.5    | 5.5    |
| 70%                                                    | 5.6 | 5.0    | 5.0    | 5.1    | 5.1    | 5.3    | 5.2    |
| 80%                                                    | 5.2 | 4.5    | 4.4    | 4.5    | 4.5    | 4.7    | 4.6    |
| 90%                                                    | 4.1 | 3.2    | 3.2    | 3.3    | 3.3    | 3.6    | 3.4    |
| 100%                                                   | 2.9 | 2.0    | 1.9    | 2.1    | 2.0    | 2.3    | 2.2    |

(c) older data, using all cells in each clonotype

- Command: public\_light\_chain\_analysis per\_cell\_stuff.old\_data MANY

| Memory B cells; all cells and clonotypes |                                 |                                          | Naive B cells; all cells and clonotypes |                                 |                                          |
|------------------------------------------|---------------------------------|------------------------------------------|-----------------------------------------|---------------------------------|------------------------------------------|
| CDRH3 amino acid % identity              | log <sub>10</sub> of cell pairs | Donors and percent light chain coherence | CDRH3 amino acid % identity             | log <sub>10</sub> of cell pairs | Donors and percent light chain coherence |
|                                          |                                 | any                                      |                                         |                                 | any                                      |
| 0%                                       | 4.1                             | 4                                        | 0%                                      | 2.5                             | 4                                        |
| 10%                                      | 6.0                             | 4                                        | 10%                                     | 5.3                             | 4                                        |
| 20%                                      | 6.9                             | 5                                        | 20%                                     | 6.5                             | 4                                        |
| 30%                                      | 7.0                             | 5                                        | 30%                                     | 6.7                             | 5                                        |
| 40%                                      | 6.7                             | 6                                        | 40%                                     | 6.5                             | 5                                        |
| 50%                                      | 6.2                             | 7                                        | 50%                                     | 6.1                             | 5                                        |
| 60%                                      | 5.4                             | 9                                        | 60%                                     | 5.5                             | 6                                        |
| 70%                                      | 4.4                             | 19                                       | 70%                                     | 4.6                             | 6                                        |
| 80%                                      | 3.6                             | 38                                       | 80%                                     | 3.7                             | 8                                        |
| 90%                                      | 2.8                             | 67                                       | 90%                                     | 2.3                             | 5                                        |
| 100%                                     | 2.4                             | 93                                       | 100%                                    | 1.4                             | 17                                       |

(d) older data, using one cell per clonotype

- Command: public\_light\_chain\_analysis per\_cell\_stuff.old\_data MANY SOLO

| Memory B cells; 1 cell per clonotype |                                 |                                          | Naive B cells; 1 cell per clonotype |                                 |                                          |
|--------------------------------------|---------------------------------|------------------------------------------|-------------------------------------|---------------------------------|------------------------------------------|
| CDRH3 amino acid % identity          | log <sub>10</sub> of cell pairs | Donors and percent light chain coherence | CDRH3 amino acid % identity         | log <sub>10</sub> of cell pairs | Donors and percent light chain coherence |
|                                      |                                 | any                                      |                                     |                                 | any                                      |
| 0%                                   | 4.0                             | 5                                        | 0%                                  | 2.5                             | 4                                        |
| 10%                                  | 5.9                             | 4                                        | 10%                                 | 5.3                             | 4                                        |
| 20%                                  | 6.7                             | 4                                        | 20%                                 | 6.5                             | 4                                        |
| 30%                                  | 6.8                             | 5                                        | 30%                                 | 6.7                             | 5                                        |
| 40%                                  | 6.6                             | 5                                        | 40%                                 | 6.5                             | 5                                        |
| 50%                                  | 6.1                             | 5                                        | 50%                                 | 6.1                             | 5                                        |
| 60%                                  | 5.2                             | 7                                        | 60%                                 | 5.5                             | 5                                        |
| 70%                                  | 4.3                             | 16                                       | 70%                                 | 4.6                             | 6                                        |
| 80%                                  | 3.4                             | 40                                       | 80%                                 | 3.7                             | 7                                        |
| 90%                                  | 2.6                             | 60                                       | 90%                                 | 2.2                             | 5                                        |
| 100%                                 | 2.1                             | 87                                       | 100%                                | 1.3                             | 18                                       |

**(e)** Phad 2022 data, using all cells in each clonotype

- Command: public\_light\_chain\_analysis

light\_chain\_coherence/results/per\_cell\_stuff.phad MANY

| Memory B cells; all cells and clonotypes |                                 |                                          | Naive B cells; all cells and clonotypes |                                 |                                          |
|------------------------------------------|---------------------------------|------------------------------------------|-----------------------------------------|---------------------------------|------------------------------------------|
| CDRH3 amino acid % identity              | log <sub>10</sub> of cell pairs | Donors and percent light chain coherence | CDRH3 amino acid % identity             | log <sub>10</sub> of cell pairs | Donors and percent light chain coherence |
|                                          |                                 | any                                      |                                         |                                 | any                                      |
| 0%                                       | 4.8                             | 4                                        | 0%                                      | 0.0                             | 0                                        |
| 10%                                      | 6.5                             | 5                                        | 10%                                     | 2.6                             | 4                                        |
| 20%                                      | 7.3                             | 5                                        | 20%                                     | 3.8                             | 5                                        |
| 30%                                      | 7.4                             | 5                                        | 30%                                     | 4.0                             | 5                                        |
| 40%                                      | 7.1                             | 6                                        | 40%                                     | 3.8                             | 5                                        |
| 50%                                      | 6.6                             | 7                                        | 50%                                     | 3.5                             | 5                                        |
| 60%                                      | 5.6                             | 12                                       | 60%                                     | 2.7                             | 5                                        |
| 70%                                      | 4.7                             | 36                                       | 70%                                     | 1.8                             | 1                                        |
| 80%                                      | 4.1                             | 63                                       | 80%                                     | 0.8                             | 0                                        |
| 90%                                      | 3.5                             | 87                                       | 90%                                     | --                              | --                                       |
| 100%                                     | 3.0                             | 79                                       | 100%                                    | --                              | --                                       |

**(f)** Phad 2022 data, using one cell per clonotype

- Command: public\_light\_chain\_analysis

light\_chain\_coherence/results/per\_cell\_stuff.phad MANY SOLO

| Memory B cells; 1 cell per clonotype |                                 |                                          | Naive B cells; 1 cell per clonotype |                                 |                                          |
|--------------------------------------|---------------------------------|------------------------------------------|-------------------------------------|---------------------------------|------------------------------------------|
| CDRH3 amino acid % identity          | log <sub>10</sub> of cell pairs | Donors and percent light chain coherence | CDRH3 amino acid % identity         | log <sub>10</sub> of cell pairs | Donors and percent light chain coherence |
|                                      |                                 | any                                      |                                     |                                 | any                                      |
| 0%                                   | 4.0                             | 4                                        | 0%                                  | 0.0                             | 0                                        |
| 10%                                  | 5.9                             | 5                                        | 10%                                 | 2.5                             | 4                                        |
| 20%                                  | 6.7                             | 5                                        | 20%                                 | 3.7                             | 5                                        |
| 30%                                  | 6.8                             | 5                                        | 30%                                 | 3.9                             | 5                                        |
| 40%                                  | 6.5                             | 5                                        | 40%                                 | 3.7                             | 5                                        |
| 50%                                  | 6.0                             | 6                                        | 50%                                 | 3.4                             | 5                                        |
| 60%                                  | 5.1                             | 8                                        | 60%                                 | 2.7                             | 6                                        |
| 70%                                  | 4.0                             | 19                                       | 70%                                 | 1.8                             | 2                                        |
| 80%                                  | 3.2                             | 45                                       | 80%                                 | 0.8                             | 0                                        |
| 90%                                  | 2.3                             | 64                                       | 90%                                 | --                              | --                                       |
| 100%                                 | 1.8                             | 69                                       | 100%                                | --                              | --                                       |

**(g)** all data, each dataset collection treated as one donor, all cells in each clonotype

- Command: public\_light\_chain\_analysis

per\_cell\_stuff, per\_cell\_stuff.phad, per\_cell\_stuff.old\_data

| Memory B cells; all cells and clonotypes |                                 |                                            |     |     |     | Naive B cells; all cells and clonotypes |                                 |                                            |     |     |     |
|------------------------------------------|---------------------------------|--------------------------------------------|-----|-----|-----|-----------------------------------------|---------------------------------|--------------------------------------------|-----|-----|-----|
| CDRH3 amino acid % identity              | log <sub>10</sub> of cell pairs | Datasets and percent light chain coherence |     |     |     | CDRH3 amino acid % identity             | log <sub>10</sub> of cell pairs | Datasets and percent light chain coherence |     |     |     |
|                                          |                                 | any                                        | 1,2 | 1,3 | 2,3 |                                         |                                 | any                                        | 1,2 | 1,3 | 2,3 |
| 0%                                       | 6.0                             | 4                                          | 4   | 5   | 4   | 0%                                      | 4.0                             | 4                                          | 5   | 4   | 7   |
| 10%                                      | 7.8                             | 5                                          | 5   | 5   | 5   | 10%                                     | 6.6                             | 4                                          | 5   | 4   | 5   |
| 20%                                      | 8.5                             | 5                                          | 5   | 5   | 5   | 20%                                     | 7.8                             | 5                                          | 5   | 5   | 5   |
| 30%                                      | 8.7                             | 5                                          | 5   | 5   | 5   | 30%                                     | 8.0                             | 5                                          | 5   | 5   | 5   |
| 40%                                      | 8.4                             | 6                                          | 6   | 6   | 6   | 40%                                     | 7.8                             | 5                                          | 5   | 5   | 5   |
| 50%                                      | 7.9                             | 7                                          | 8   | 6   | 6   | 50%                                     | 7.4                             | 5                                          | 5   | 5   | 5   |
| 60%                                      | 7.0                             | 12                                         | 13  | 11  | 10  | 60%                                     | 6.8                             | 6                                          | 6   | 6   | 5   |
| 70%                                      | 6.1                             | 29                                         | 31  | 27  | 28  | 70%                                     | 5.9                             | 6                                          | 6   | 6   | 7   |
| 80%                                      | 5.4                             | 55                                         | 56  | 53  | 56  | 80%                                     | 5.0                             | 6                                          | 8   | 6   | 6   |
| 90%                                      | 4.6                             | 69                                         | 67  | 71  | 71  | 90%                                     | 3.5                             | 8                                          | 8   | 8   | 13  |
| 100%                                     | 4.0                             | 70                                         | 58  | 86  | 82  | 100%                                    | 2.2                             | 15                                         | 25  | 15  | --  |

**(h)** all data, each dataset collection treated as one donor, one cell per clonotype

public\_light\_chain\_analysis

per\_cell\_stuff, per\_cell\_stuff.phad, per\_cell\_stuff.old\_data S0L0

| Memory B cells; 1 cell per clonotype |                                 |                                            |     |     |     | Naive B cells; 1 cell per clonotype |                                 |                                            |     |     |     |
|--------------------------------------|---------------------------------|--------------------------------------------|-----|-----|-----|-------------------------------------|---------------------------------|--------------------------------------------|-----|-----|-----|
| CDRH3 amino acid % identity          | log <sub>10</sub> of cell pairs | Datasets and percent light chain coherence |     |     |     | CDRH3 amino acid % identity         | log <sub>10</sub> of cell pairs | Datasets and percent light chain coherence |     |     |     |
|                                      |                                 | any                                        | 1,2 | 1,3 | 2,3 |                                     |                                 | any                                        | 1,2 | 1,3 | 2,3 |
| 0%                                   | 5.5                             | 5                                          | 5   | 5   | 5   | 0%                                  | 4.0                             | 4                                          | 5   | 4   | 8   |
| 10%                                  | 7.4                             | 5                                          | 5   | 5   | 5   | 10%                                 | 6.6                             | 4                                          | 5   | 4   | 5   |
| 20%                                  | 8.2                             | 5                                          | 5   | 5   | 5   | 20%                                 | 7.8                             | 5                                          | 5   | 5   | 5   |
| 30%                                  | 8.3                             | 5                                          | 5   | 5   | 5   | 30%                                 | 8.0                             | 5                                          | 5   | 5   | 5   |
| 40%                                  | 8.0                             | 5                                          | 5   | 5   | 5   | 40%                                 | 7.8                             | 5                                          | 5   | 5   | 5   |
| 50%                                  | 7.5                             | 6                                          | 6   | 6   | 6   | 50%                                 | 7.4                             | 5                                          | 5   | 5   | 5   |
| 60%                                  | 6.7                             | 8                                          | 8   | 8   | 8   | 60%                                 | 6.8                             | 6                                          | 6   | 6   | 5   |
| 70%                                  | 5.7                             | 17                                         | 16  | 17  | 17  | 70%                                 | 5.9                             | 6                                          | 6   | 6   | 7   |
| 80%                                  | 4.9                             | 39                                         | 37  | 39  | 42  | 80%                                 | 4.9                             | 7                                          | 7   | 6   | 6   |
| 90%                                  | 4.0                             | 62                                         | 59  | 63  | 63  | 90%                                 | 3.5                             | 8                                          | 7   | 8   | 9   |
| 100%                                 | 3.3                             | 77                                         | 76  | 80  | 73  | 100%                                | 2.2                             | 13                                         | 25  | 13  | --  |



(i) data of this work, using all cells in each clonotype, comparing within donors (**Figure 1b**)  
private\_light\_chain\_analysis per\_cell\_stuff

| Memory B cells              |                                 |                                          |    |    |    |    | Naive B cells               |                                 |                                          |    |    |    |    |
|-----------------------------|---------------------------------|------------------------------------------|----|----|----|----|-----------------------------|---------------------------------|------------------------------------------|----|----|----|----|
| CDRH3 amino acid % identity | log <sub>10</sub> of cell pairs | Donors and percent light chain coherence |    |    |    |    | CDRH3 amino acid % identity | log <sub>10</sub> of cell pairs | Donors and percent light chain coherence |    |    |    |    |
|                             |                                 | All                                      | 1  | 2  | 3  | 4  |                             |                                 | All                                      | 1  | 2  | 3  | 4  |
| 0%                          | 4.8                             | 4                                        | 5  | 4  | 5  | 3  | 0%                          | 4.1                             | 4                                        | 4  | 3  | 4  | 4  |
| 10%                         | 6.5                             | 5                                        | 5  | 4  | 4  | 4  | 10%                         | 6.6                             | 5                                        | 5  | 5  | 5  | 5  |
| 20%                         | 7.4                             | 5                                        | 5  | 4  | 5  | 5  | 20%                         | 7.8                             | 5                                        | 5  | 5  | 5  | 5  |
| 30%                         | 7.6                             | 5                                        | 5  | 5  | 5  | 5  | 30%                         | 8.0                             | 5                                        | 5  | 5  | 5  | 5  |
| 40%                         | 7.3                             | 5                                        | 5  | 5  | 5  | 5  | 40%                         | 7.8                             | 5                                        | 5  | 5  | 5  | 5  |
| 50%                         | 6.9                             | 6                                        | 6  | 5  | 5  | 5  | 50%                         | 7.5                             | 5                                        | 5  | 5  | 5  | 5  |
| 60%                         | 6.1                             | 8                                        | 9  | 7  | 7  | 6  | 60%                         | 6.8                             | 5                                        | 6  | 5  | 6  | 5  |
| 70%                         | 5.2                             | 15                                       | 18 | 14 | 12 | 12 | 70%                         | 6.0                             | 6                                        | 6  | 6  | 6  | 6  |
| 80%                         | 4.3                             | 36                                       | 42 | 33 | 25 | 32 | 80%                         | 5.0                             | 6                                        | 8  | 6  | 6  | 6  |
| 90%                         | 3.5                             | 60                                       | 61 | 55 | 55 | 62 | 90%                         | 3.6                             | 8                                        | 11 | 7  | 8  | 8  |
| 100%                        | 3.0                             | 65                                       | 66 | 70 | 66 | 62 | 100%                        | 2.5                             | 12                                       | 16 | 12 | 12 | 10 |

| Data source | Simulation parameters |                 | Average junction property |                            |                       |                   |                                           |           |                   |
|-------------|-----------------------|-----------------|---------------------------|----------------------------|-----------------------|-------------------|-------------------------------------------|-----------|-------------------|
|             | Unique sequences      | Selection model | VDJ recurrences (# ± SEM) | VDDJ recurrences (# ± SEM) | Insertion length (NT) | Substitution rate | Substitution rate (cells w/ 0 insertions) | VDDJ rate | CDRH3 length (AA) |
| Real        | --                    | --              | 754.0 ( N/A )             | 0.0 (N/A )                 | 5.0                   | 15.6%             | 7.2%                                      | 0.52%     | 18.4              |
| Naive       | No                    | Post            | 1189.6 (±10.8)            | 1.8 (±0.7)                 | 5.3                   | 16.5%             | 7.3%                                      | 0.32%     | 18.1              |
| Naive       | Yes                   | Post            | 1217.3 (±16.9)            | 0.6 (±0.3)                 | 5.4                   | 16.6%             | 7.3%                                      | 0.32%     | 18.1              |
| Memory      | No                    | Post            | 1444.5 (±13.8)            | 1.0 (±0.3)                 | 4.8                   | 17.4%             | 7.7%                                      | 0.35%     | 17.4              |
| Memory      | Yes                   | Post            | 1632.0 (±14.8)            | 1.6 (±0.6)                 | 4.6                   | 17.5%             | 7.7%                                      | 0.28%     | 17.2              |
| Naive       | No                    | Pre             | 167.4 (± 5.8)             | 1.4 (±0.6)                 | 8.7                   | 16.7%             | 8.3%                                      | 1.32%     | 21.0              |
| Naive       | Yes                   | Pre             | 172.1 (± 3.6)             | 1.0 (±0.4)                 | 8.8                   | 16.7%             | 8.8%                                      | 1.30%     | 21.0              |
| Memory      | No                    | Pre             | 173.3 (± 6.1)             | 1.0 (±0.3)                 | 8.8                   | 16.8%             | 8.3%                                      | 1.34%     | 21.0              |
| Memory      | Yes                   | Pre             | 175.4 (± 4.5)             | 2.0 (±0.6)                 | 8.7                   | 16.7%             | 8.3%                                      | 1.35%     | 21.1              |

**Supplementary Table 3. A comparison of repertoire properties and recurrence rates for multiple simulation settings.** We examined the effects of training soNNia models using naive sequences vs. memory sequences for training data, whether the training data were deduplicated (unique) or used all observed sequences from all cells, and using preselection vs. postselection models.

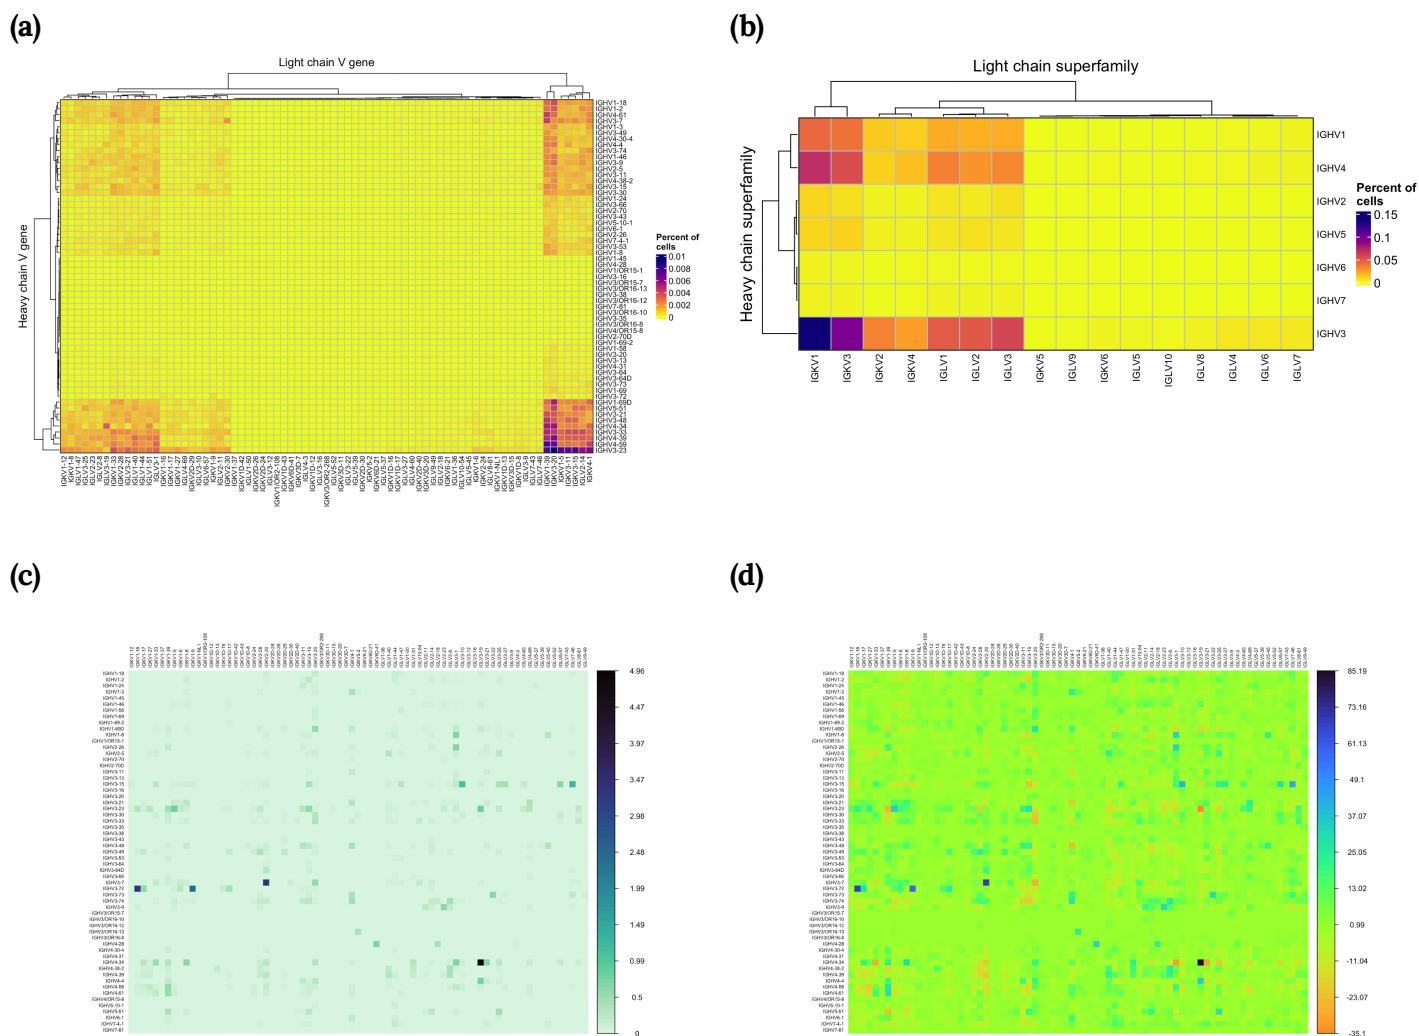

**Supplementary Figure 1. Associations between V<sub>H</sub> and V<sub>L</sub> gene usage from 1.2 million single B cells.** Using unique CDR3 sequences (n=1,214,376) from all donors, we tabulated V<sub>H</sub> and V<sub>L</sub> gene usage. We then performed a two-sided chi-squared test and calculated its significance via Monte Carlo simulation (10<sup>5</sup> bootstraps, p = 0.00008). This provides evidence of statistically significant associations between V<sub>H</sub> and V<sub>L</sub> genes. **(a)** Gene-level associations between V<sub>H</sub> and V<sub>L</sub> genes. **(b)** Superfamily-level associations between V<sub>H</sub> and V<sub>L</sub> genes. and b at the superfamily and gene levels respectively. **(c)** Heatmap of the residuals of the chi-squared test, visualizing important associations that contributed to the significance of the test. **(d)** Heatmap of the contributions of the residuals of the chi-squared test, visualizing important associations that contributed to the significance of the test.

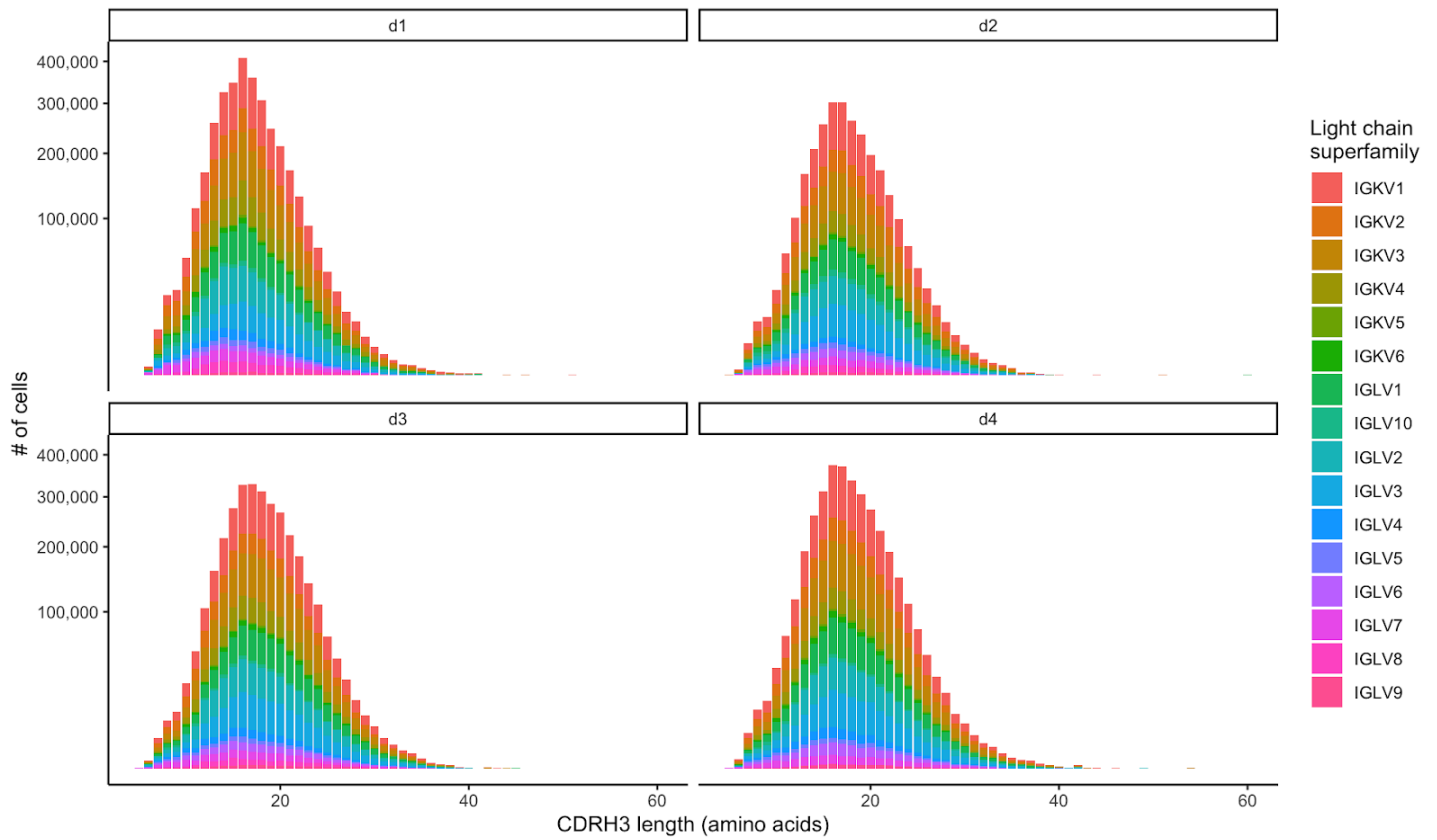

**Supplementary Figure 2. Per-donor CDRH3 length distributions.** Each histogram barplot is fractionally colored by the number of cells with a given light chain V gene superfamily.
